# Supplementary material for: Diffusion Tensor Imaging Detects Acute and Subacute Changes in Corpus Callosum in Blast-Induced Traumatic Brain Injury
Source: PubMed Central journal article supplement (PMC7238783; doi:10.1177/1759091420922929), 2020-05-13
Supplement: sj-pdf-1-asn-10.1177_1759091420922929.pdf [file sj-pdf-1-asn-10.1177_1759091420922929.pdf]

**Supplementary Table 1: Significance of changes in diffusion metrics in the left hemisphere of bTBI rats**

*(Results are from Fisher LSD post hoc comparisons)*

| LOCATION        | FA                 |                 | MD                  |                 | AD                  |                 | RD                  |                 |
|-----------------|--------------------|-----------------|---------------------|-----------------|---------------------|-----------------|---------------------|-----------------|
|                 | D1:Control vs bTBI | bTBI: D1 vs D14 | D1: Control vs bTBI | bTBI: D1 vs D14 | D1: Control vs bTBI | bTBI: D1 vs D14 | D1: Control vs bTBI | bTBI: D1 vs D14 |
| <b>MCC</b>      |                    |                 |                     |                 |                     |                 |                     |                 |
| <i>Splenium</i> | 0.679662           | 0.000803        | 0.090961            | 0.000001665     | 0.094956            | 0.009695        | 0.501062            | 0.025062        |
| <i>Body</i>     | 0.072135           | 0.006409        | 0.075607            | 0.000000085     | 0.461315            | 0.002294        | 0.005334            | 0.001292        |
| <i>Genu</i>     | 0.002818           | 0.007365        | 0.000086            | 0.000001024     | 0.020621            | 0.016448        | 0.000760            | 0.000003        |
| <b>LCC</b>      |                    |                 |                     |                 |                     |                 |                     |                 |
| <i>Splenium</i> | 0.000331           | 0.004761        | 0.003508            | 0.000000000     | 0.032385            | 0.000054        | 0.580439            | 0.981207        |
| <i>Body</i>     | 0.000443           | 0.000087        | 0.000001            | 0.000000000     | 0.000203            | 0.000031        | 0.206139            | 0.623793        |
| <i>Genu</i>     | 0.180501           | 0.020521        | 0.030801            | 0.000000002     | 0.014017            | 0.000258        | 0.728029            | 0.298201        |
| <b>CG</b>       |                    |                 |                     |                 |                     |                 |                     |                 |
| <i>Caudal</i>   | 0.000283           | 0.258446        | 0.036688            | 0.000000013     | 0.161690            | 0.011764        | 0.000334            | 0.000000032     |
| <i>Middle</i>   | 0.000242           | 0.027097        | 0.007561            | 0.000000000     | 0.014831            | 0.001105        | 0.486280            | 0.000000176     |
| <i>Rostral</i>  | 0.016707           | 0.100008        | 0.014680            | 0.000000001     | 0.089182            | 0.000023        | 0.143375            | 0.000007        |

|                      |                  |                  |
|----------------------|------------------|------------------|
| <b>Significance:</b> | <b>p&lt;0.01</b> | <b>p&lt;0.05</b> |
|----------------------|------------------|------------------|

**Supplementary Table 2: Diffusion changes in the right hemisphere of bTBI rats**

*(Directions of significant diffusion metric changes are shown. Left hemisphere changes followed a similar pattern.)*

| LOCATION          | FA          |           |  | MD          |           |  | AD          |           |  | RD          |           |
|-------------------|-------------|-----------|--|-------------|-----------|--|-------------|-----------|--|-------------|-----------|
|                   | D1: Control | bTBI:     |  | D1: Control | bTBI:     |  | D1: Control | bTBI:     |  | D1: Control | bTBI:     |
|                   | vs bTBI     | D1 vs D14 |  | vs bTBI     | D1 vs D14 |  | vs bTBI     | D1 vs D14 |  | vs bTBI     | D1 vs D14 |
| <b>Medial CC</b>  |             |           |  |             |           |  |             |           |  |             |           |
| <i>Splenium</i>   |             | ↑         |  | ↓           |           |  | ↓           |           |  |             |           |
| <i>Body</i>       | ↓           | ↑         |  | ↑           | ↓         |  |             | ↓         |  | ↑           | ↑         |
| <i>Genu</i>       | ↓           | ↑         |  | ↑           | ↓         |  | ↑           | ↓         |  | ↑           | ↑         |
|                   |             |           |  |             |           |  |             |           |  |             |           |
| <b>Lateral CC</b> |             |           |  |             |           |  |             |           |  |             |           |
| <i>Splenium</i>   | ↓           | ↑         |  | ↑           | ↓         |  |             | ↓         |  |             |           |
| <i>Body</i>       | ↓           | ↑         |  | ↑           | ↓         |  |             | ↓         |  |             |           |
| <i>Genu</i>       | ↓           | ↑         |  |             | ↓         |  |             | ↓         |  |             |           |
|                   |             |           |  |             |           |  |             |           |  |             |           |
| <b>Cingulum</b>   |             |           |  |             |           |  |             |           |  |             |           |
| <i>Caudal</i>     | ↓           | ↑         |  |             | ↓         |  |             | ↑         |  | ↑           | ↓         |
| <i>Middle</i>     | ↓           | ↑         |  | ↑           | ↓         |  |             | ↑         |  |             | ↓         |
| <i>Rostral</i>    | ↓           | ↑         |  | ↑           | ↓         |  |             | ↑         |  |             | ↓         |
